# Supplementary material
Source: Springer Nature journal article supplement (https://www.springermedizin.de/resource/supplementary/12881_2012_1175_MOESM4_ESM.pdf/9452056)

(A)

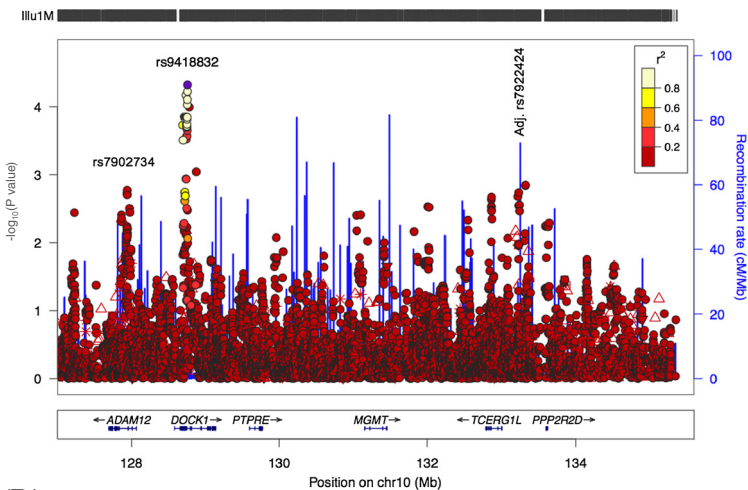

(B)

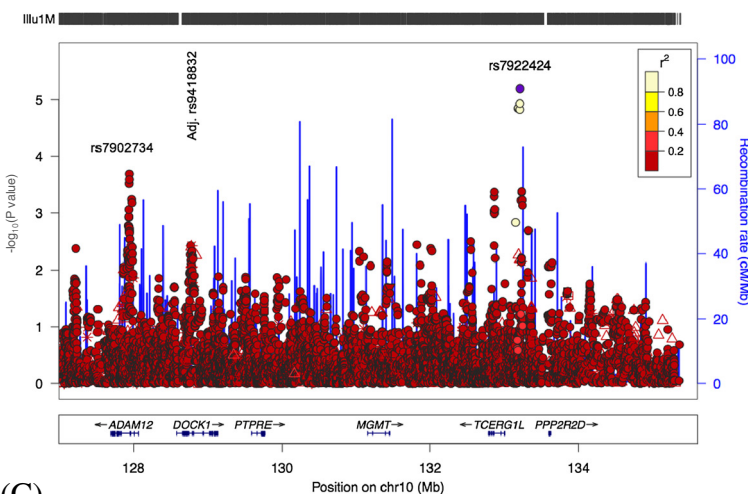

(C)

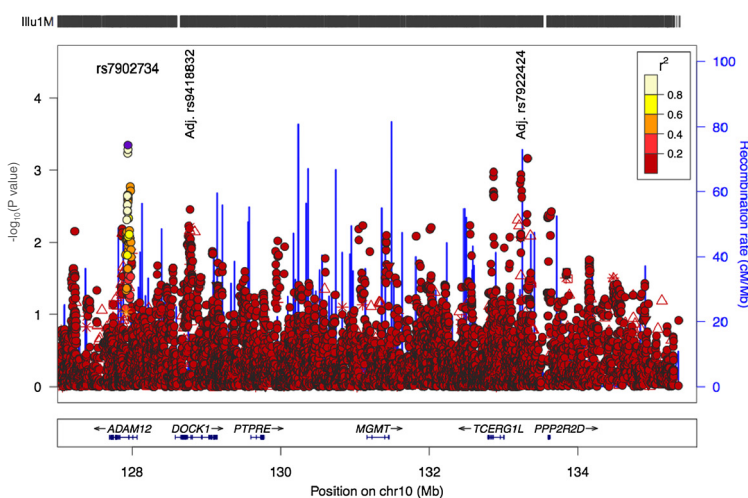

Supplement: MOESM4 [file 9452056]
